# Supplementary material
Source: PubMed Central journal article supplement (PMC4073211)
Supplement: NIHMS593687-supplement-1.pdf [file NIHMS593687-supplement-1.pdf]

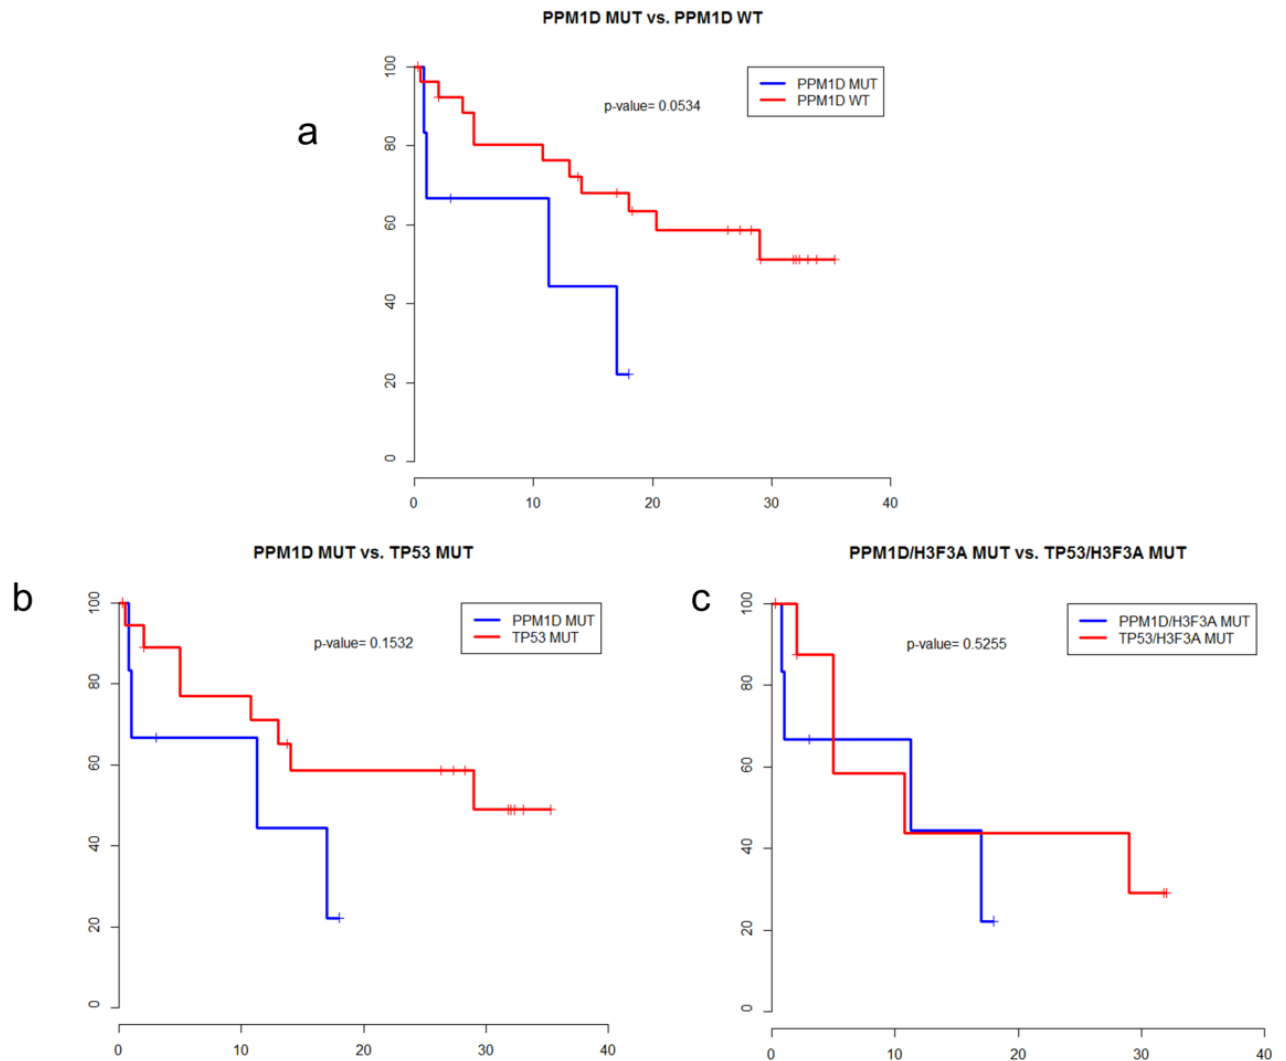

**Supplementary Figure 1** Kaplan-Meier survival curves of brainstem patients. (a) Comparison between *PPM1D* mutation vs. *PPM1D* WT patients. (b) Comparison between *PPM1D* mutation vs. *TP53* mutation patients. (c) Comparison between *PPM1D/H3F3A* mutations vs. *TP53/H3F3A* mutations patients.

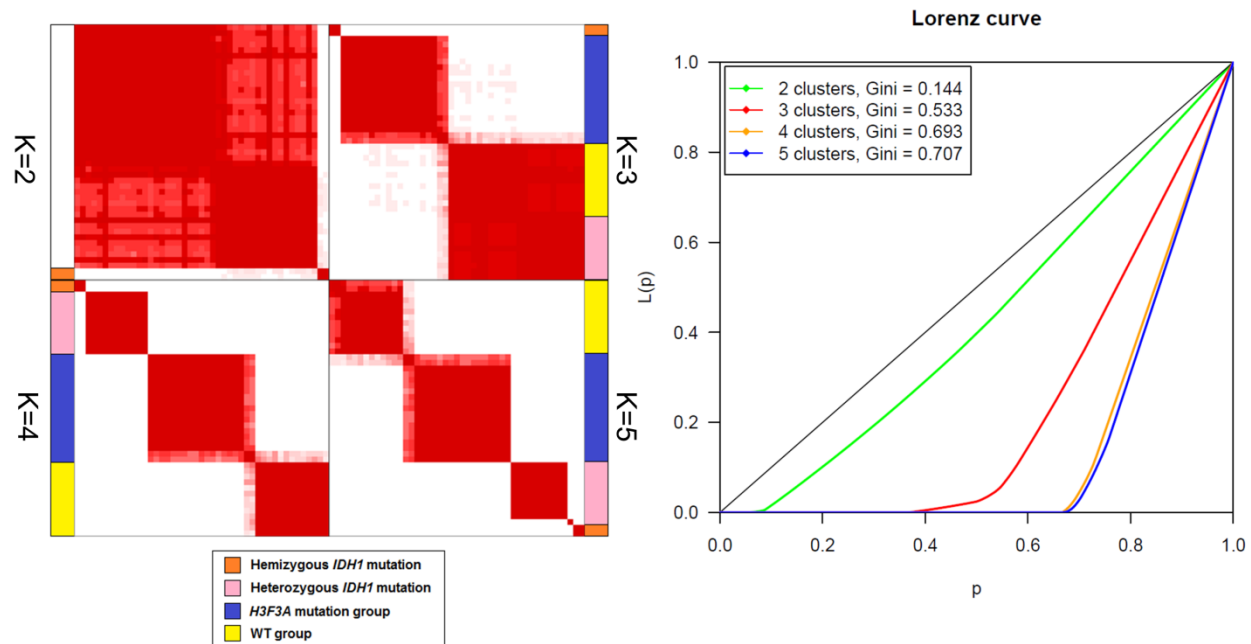

**Supplementary Figure 2** Consensus clustering by methylation beta-value and Lorenz curve. Our three groups could be mapped almost perfectly to the *IDH1* and *H3F3A* mutation status. We also noted that hemizygous *IDH1* mutation samples could be differentiated from heterozygous *IDH1* mutation samples.

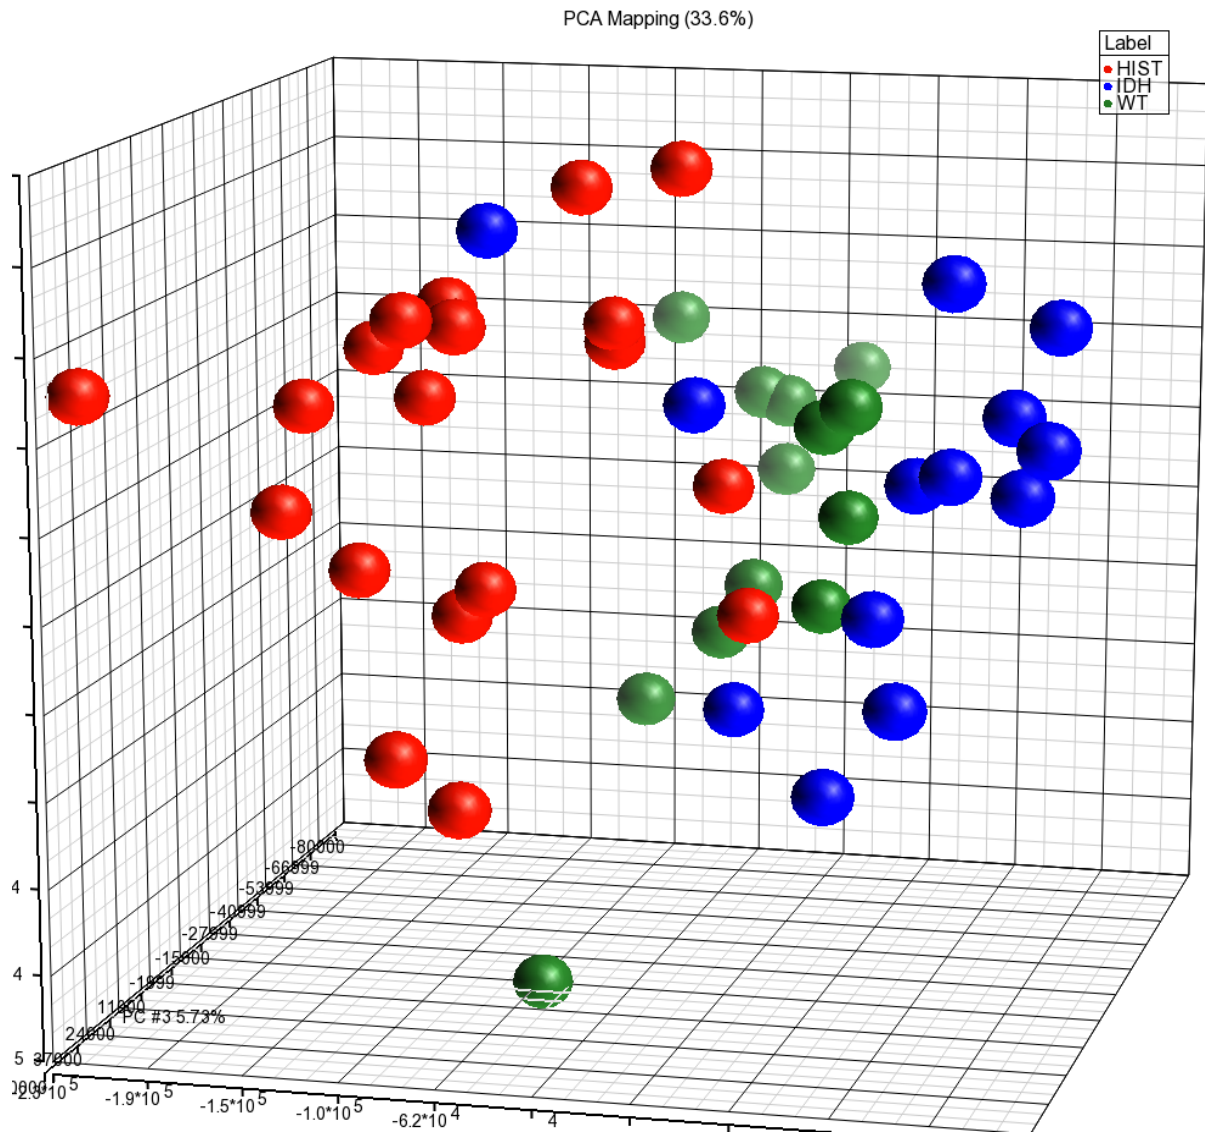

**Supplementary Figure 3** Principal component analysis for our 45 samples. *H3F3A* mutation (HIST), *IDH1* mutation (IDH) and neither mutation (WT) could be differentiated by DNA methylation level.

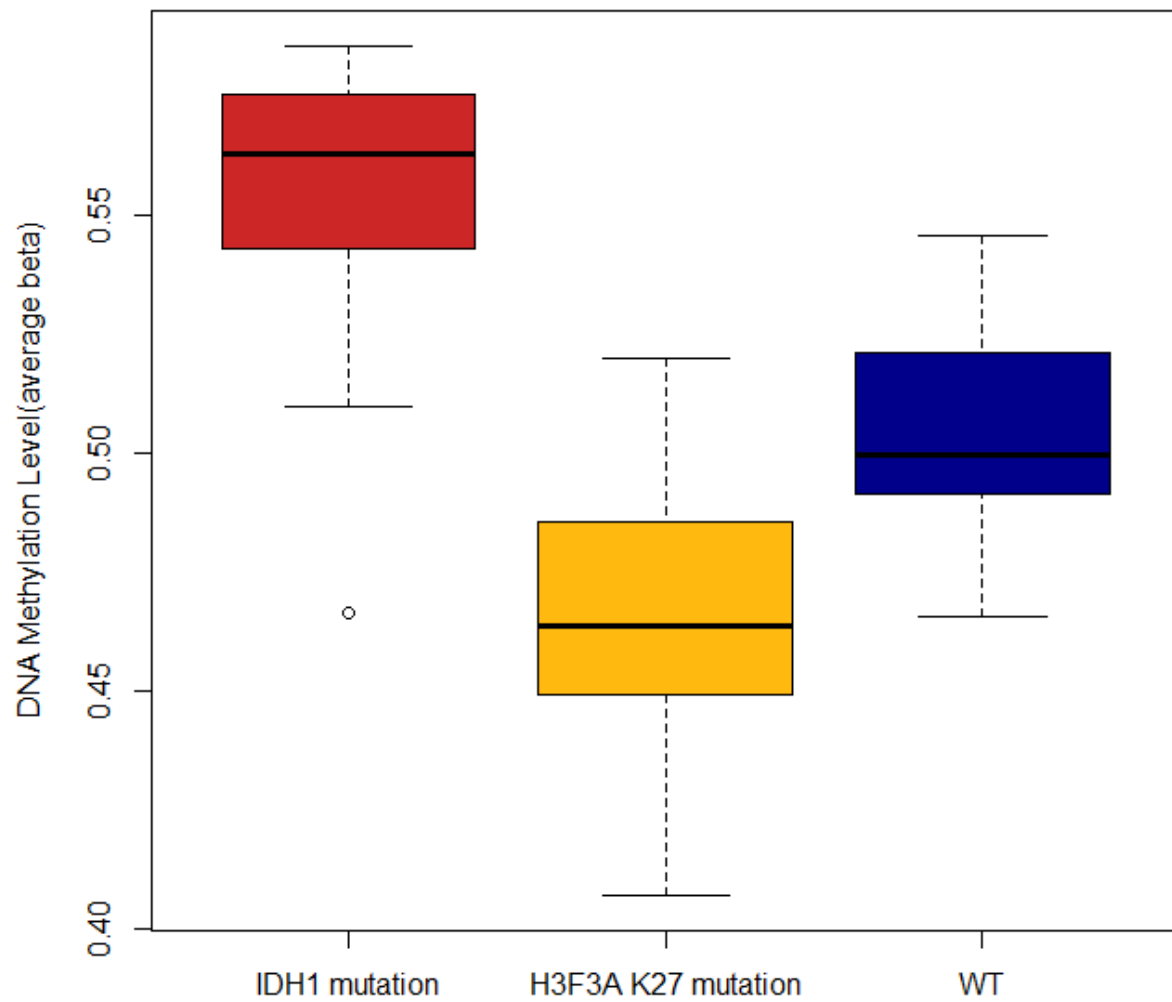

**Supplementary Figure 4** Boxplot for DNA methylation level for sample averages. *IDH1* mutation group shows hypermethylated pattern while *H3F3A* mutation group shows hypomethylated pattern.

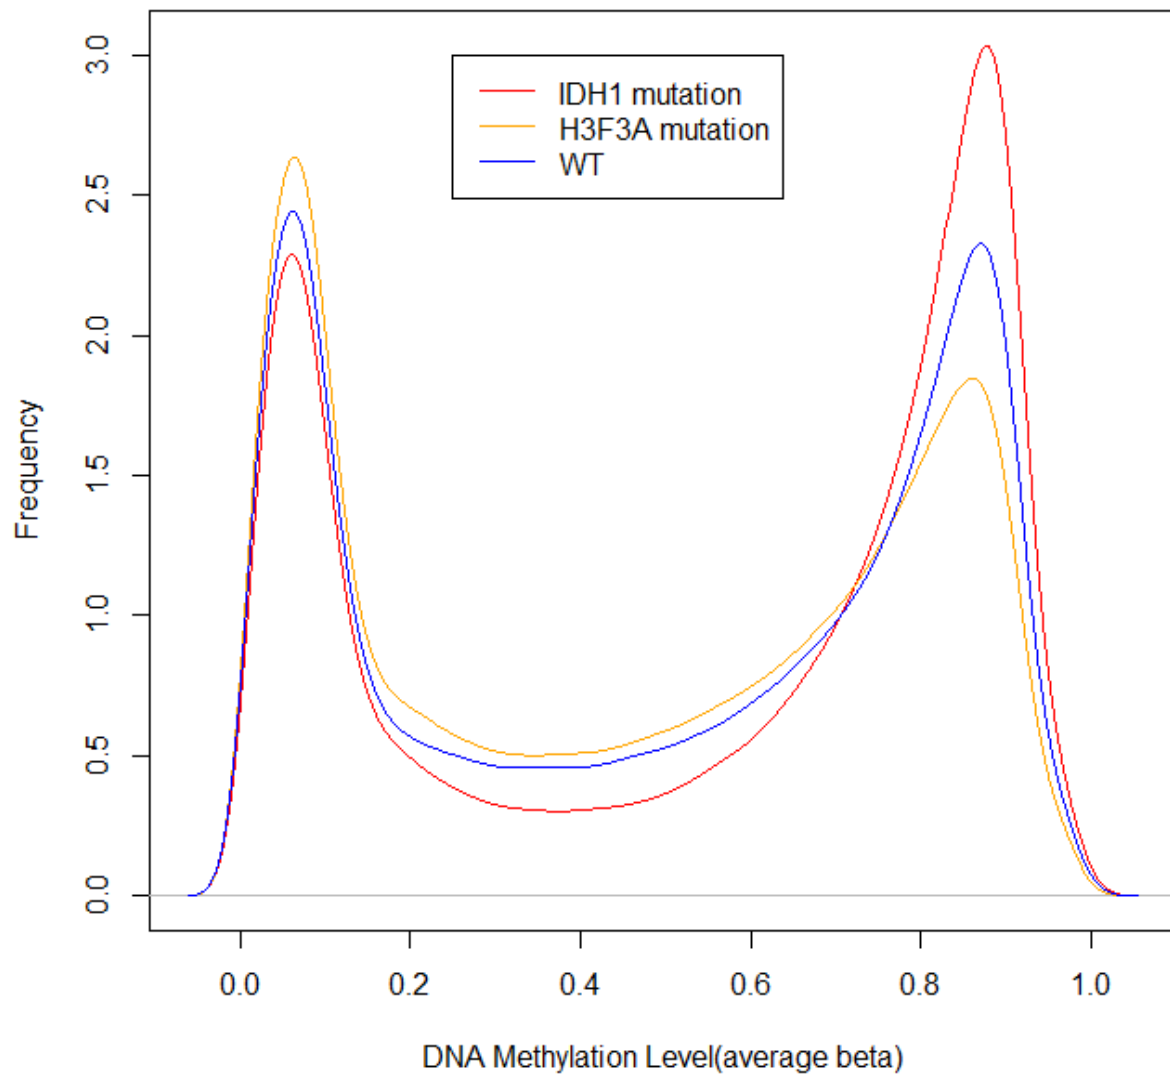

**Supplementary Figure 5** Density plot for probes of DNA methylation level (beta-value) in different groups. *IDH1* mutation group (red) shows hypermethylated pattern and *H3F3A* (K27) mutation group (orange) shows hypomethylated pattern.

NM\_003620  
(reference sequence)

HCT116 parental  
(PPM1D-L450X)

HCT116 repaired #1  
(PPM1D-WT)

HCT116 repaired #2  
(PPM1D-WT)

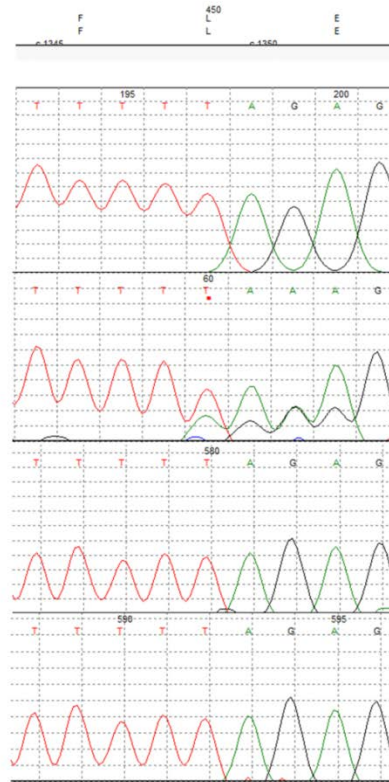

**Supplementary Figure 6** Electropherograms of HCT116 parental, repaired #1, and repaired #2. Electropherograms demonstrate repair of the heterozygous frameshift mutation to a wild type *PPM1D* sequence in these lines.

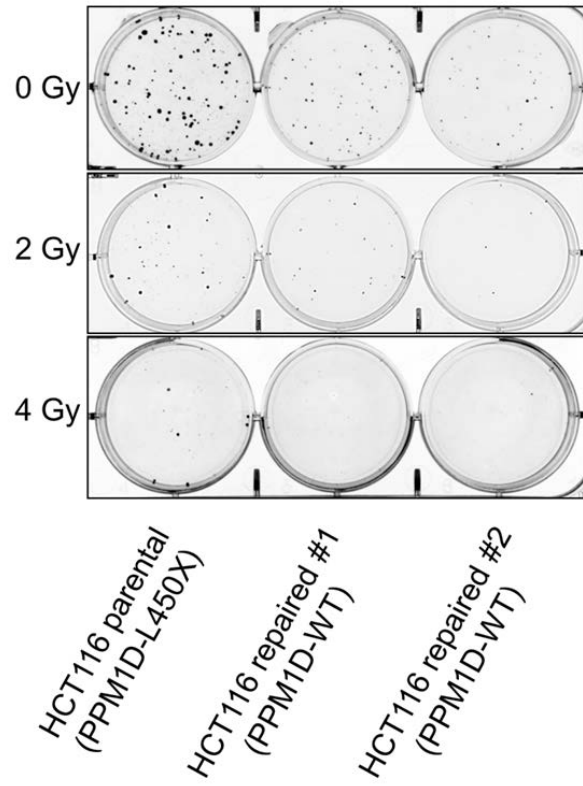

**Supplementary Figure 7** Colony formation assay HCT116 parental, repaired #1, and repaired #2. Colony formation was assessed in the absence of IR, and under 2 Gy, or 4 Gy IR. Representative stained colony formation plates are shown.

**Supplementary Table 1** Summary table of the 50 cases included in this genomic study

| Patient ID    | Gender | Age | Histopathology    | Grade | Location                                 | Sequencing |
|---------------|--------|-----|-------------------|-------|------------------------------------------|------------|
| 234           | female | 30  | Astrocytoma       | III   | medulla and C2                           | WES, TSS   |
| 235           | male   | 31  | Oligodendroglioma | III   | right medulla                            | WES, TSS   |
| 237           | female | 44  | Oligoastrocytoma  | II    | pons and medulla                         | WES, TSS   |
| 238           | male   | 25  | GBM               | IV    | thalamus, pons, medulla and cerebellum   | WES, TSS   |
| 239           | female | 42  | Oligoastrocytoma  | III   | right pons and medulla                   | WES, TSS   |
| 240           | female | 10  | Oligoastrocytoma  | III   | right pons                               | WES, TSS   |
| 241           | female | 23  | Astrocytoma       | III   | left midbrain and left thalamus          | WES, TSS   |
| 242           | female | 49  | Oligoastrocytoma  | III   | left pons                                | WES, TSS   |
| 243           | male   | 30  | Oligoastrocytoma  | III   | midbrain                                 | WES, TSS   |
| 244           | male   | 38  | Oligoastrocytoma  | II    | pons and medulla                         | WES, TSS   |
| 245           | male   | 45  | Oligoastrocytoma  | II    | midbrain,pons,medulla and cerebellum     | WES, TSS   |
| 246           | male   | 16  | Astrocytoma       | II    | pons                                     | WES, TSS   |
| 247           | male   | 25  | GBM               | IV    | pons and medulla                         | WES, TSS   |
| 313           | male   | 20  | GBM               | IV    | brainstem                                | WES, TSS   |
| 248           | male   | 48  | Oligodendroglioma | III   | left thalamus                            | WES, TSS   |
| 249           | female | 24  | Oligoastrocytoma  | III   | left thalamus                            | WES, TSS   |
| 250           | male   | 11  | Astrocytoma       | III   | right thalamus                           | WES, TSS   |
| 251           | male   | 42  | Astrocytoma       | III   | right thalamus                           | WES, TSS   |
| 252           | female | 53  | Oligoastrocytoma  | II    | left thalamus + midbrain                 | WES, TSS   |
| 254           | male   | 12  | Oligodendroglioma | III   | right thalamus                           | WES, TSS   |
| 255           | female | 5   | Oligoastrocytoma  | II    | left thalamus + midbrain                 | WES, TSS   |
| 257           | male   | 27  | Astrocytoma       | II    | bilateral thalamus, mainly in right      | WES, TSS   |
| 258           | male   | 41  | GBM               | IV    | right thalamus                           | WES, TSS   |
| 259           | male   | 24  | GBM               | IV    | right thalamus, third and left ventricle | WES, TSS   |
| 260           | male   | 15  | Astrocytoma       | II    | left thalamus                            | WES, TSS   |
| 261           | female | 22  | GBM               | IV    | left thalamus                            | WES, TSS   |
| <b>BST-2</b>  | female | 10  | Astrocytoma       | II    | left pons                                | TSS        |
| <b>19</b>     | male   | 22  | Oligoastrocytoma  | II    | right pons and right medulla             | TSS        |
| <b>8</b>      | male   | 47  | GBM               | IV    | pons                                     | TSS        |
| <b>4</b>      | male   | 6   | Astrocytoma       | II    | medulla and C7                           | TSS        |
| <b>6</b>      | female | 21  | Astrocytoma       | II    | pons                                     | TSS        |
| <b>13</b>     | male   | 46  | Oligoastrocytoma  | II    | left pons                                | TSS        |
| <b>16</b>     | female | 38  | Astrocytoma       | II    | right pons and right medulla             | TSS        |
| <b>2</b>      | male   | 41  | Oligoastrocytoma  | II    | pons and medulla                         | TSS        |
| <b>BST-14</b> | female | 38  | Oligoastrocytoma  | II    | pons                                     | TSS        |
| <b>BST-15</b> | female | 32  | Astrocytoma       | II    | pons                                     | TSS        |
| <b>BST-17</b> | male   | 31  | Oligoastrocytoma  | II    | midbrain and the third ventricle         | TSS        |
| <b>BST-20</b> | female | 10  | Astrocytoma       | II    | pons                                     | TSS        |
| <b>3</b>      | male   | 12  | Astrocytoma       | II    | medulla                                  | TSS        |
| <b>9</b>      | male   | 6   | Astrocytoma       | II    | pons                                     | TSS        |
| <b>11</b>     | female | 11  | Oligoastrocytoma  | II    | medulla                                  | TSS        |
| <b>12</b>     | male   | 29  | Astrocytoma       | III   | brainstem                                | TSS        |
| <b>14</b>     | female | 40  | Astrocytoma       | II    | pons and medulla                         | TSS        |



|           |        |    |                  |     |                  |     |
|-----------|--------|----|------------------|-----|------------------|-----|
| <b>18</b> | male   | 27 | Astrocytoma      | II  | pons and medulla | TSS |
| <b>24</b> | female | 8  | Astrocytoma      | III | pons and medulla | TSS |
| <b>1</b>  | male   | 14 | Oligoastrocytoma | II  | right thalamus   | TSS |
| <b>10</b> | male   | 47 | GBM              | IV  | right thalamus   | TSS |
| <b>15</b> | female | 5  | Astrocytoma      | III | right thalamus   | TSS |
| <b>21</b> | male   | 23 | GBM              | IV  | left thalamus    | TSS |
| <b>23</b> | female | 44 | GBM              | IV  | right thalamus   | TSS |

#WES: Whole Exome Sequencing, TSS: Targeted Sanger Sequencing

**Supplementary Table 2** Summary table of Whole Exome Sequencing Statistics

| Case |        | Number of somatic sequence alterations identified | Number of somatic copy number alterations identified | Sequenced Bases Mapped to Genome(G) | Sequenced Bases Mapped to Target Regions(G) | Fraction of Sequenced Bases Mapped to Target Regions | Bases in target regions with at least 10 reads(M) | Fraction of bases in target regions with at least 10 reads | Average Number of Total High Quality Sequences at Each Base | Average Number of Distinct High Quality Sequences at Each Base |
|------|--------|---------------------------------------------------|------------------------------------------------------|-------------------------------------|---------------------------------------------|------------------------------------------------------|---------------------------------------------------|------------------------------------------------------------|-------------------------------------------------------------|----------------------------------------------------------------|
| 234  | Tumor  | 30                                                | 75                                                   | 9.9                                 | 5.2                                         | 52.58%                                               | 50.19                                             | 92.41%                                                     | 89.14                                                       | 79.6                                                           |
|      | Normal |                                                   |                                                      | 9.23                                | 5.22                                        | 56.55%                                               | 50.72                                             | 93.40%                                                     | 94.37                                                       | 82.61                                                          |
| 235  | Tumor  | 24                                                | 55                                                   | 9.84                                | 5.27                                        | 53.49%                                               | 50.39                                             | 92.79%                                                     | 90.69                                                       | 79.57                                                          |
|      | Normal |                                                   |                                                      | 8.3                                 | 4.62                                        | 55.63%                                               | 50.09                                             | 92.23%                                                     | 83.62                                                       | 75.13                                                          |
| 237  | Tumor  | 27                                                | 0                                                    | 8.03                                | 4.37                                        | 54.49%                                               | 50.17                                             | 92.38%                                                     | 73.95                                                       | 66.03                                                          |
|      | Normal |                                                   |                                                      | 9.51                                | 4.98                                        | 52.32%                                               | 50.6                                              | 93.17%                                                     | 89.13                                                       | 78.16                                                          |
| 238  | Tumor  | 29                                                | 150                                                  | 10.9                                | 6.3                                         | 57.91%                                               | 47.28                                             | 87.06%                                                     | 109.01                                                      | 68.39                                                          |
|      | Normal |                                                   |                                                      | 9.12                                | 5.02                                        | 55.02%                                               | 50.57                                             | 93.12%                                                     | 89.87                                                       | 77.26                                                          |
| 239  | Tumor  | 31                                                | 0                                                    | 9.5                                 | 5.55                                        | 58.40%                                               | 50.68                                             | 93.32%                                                     | 95.49                                                       | 84.07                                                          |
|      | Normal |                                                   |                                                      | 7.16                                | 4.25                                        | 59.25%                                               | 50.15                                             | 92.35%                                                     | 76.61                                                       | 66.21                                                          |
| 240  | Tumor  | 19                                                | 0                                                    | 9.62                                | 5.56                                        | 57.73%                                               | 50.85                                             | 93.63%                                                     | 95.39                                                       | 85.8                                                           |
|      | Normal |                                                   |                                                      | 9.01                                | 5.24                                        | 58.19%                                               | 50.75                                             | 93.45%                                                     | 94.69                                                       | 82.06                                                          |
| 241  | Tumor  | 15                                                | 0                                                    | 9.97                                | 5.48                                        | 54.92%                                               | 50.46                                             | 92.92%                                                     | 94.03                                                       | 80.58                                                          |
|      | Normal |                                                   |                                                      | 7.33                                | 4.16                                        | 56.73%                                               | 49.97                                             | 92.01%                                                     | 74.93                                                       | 68.76                                                          |
| 242  | Tumor  | 69                                                | 0                                                    | 8.83                                | 4.78                                        | 54.14%                                               | 50.64                                             | 93.25%                                                     | 81.1                                                        | 71.37                                                          |
|      | Normal |                                                   |                                                      | 11.13                               | 6.71                                        | 60.30%                                               | 51.1                                              | 94.10%                                                     | 120.99                                                      | 97.04                                                          |
| 243  | Tumor  | 26                                                | 1                                                    | 8.59                                | 4.78                                        | 55.66%                                               | 50.66                                             | 93.29%                                                     | 82.09                                                       | 74.07                                                          |
|      | Normal |                                                   |                                                      | 8.03                                | 4.58                                        | 57.07%                                               | 50.23                                             | 92.50%                                                     | 83.08                                                       | 74.16                                                          |
| 244  | Tumor  | 20                                                | 0                                                    | 9.29                                | 4.86                                        | 52.27%                                               | 50.79                                             | 93.53%                                                     | 83.65                                                       | 77.13                                                          |
|      | Normal |                                                   |                                                      | 9.15                                | 5.23                                        | 57.11%                                               | 50.76                                             | 93.47%                                                     | 94.62                                                       | 83.49                                                          |
| 245  | Tumor  | 25                                                | 0                                                    | 9.83                                | 5.57                                        | 56.63%                                               | 50.73                                             | 93.41%                                                     | 95.86                                                       | 82.24                                                          |
|      | Normal |                                                   |                                                      | 8.48                                | 4.86                                        | 57.27%                                               | 50.29                                             | 92.61%                                                     | 87.99                                                       | 75.57                                                          |
| 246  | Tumor  | 27                                                | 11                                                   | 9.19                                | 5.09                                        | 55.36%                                               | 49.99                                             | 92.05%                                                     | 87.61                                                       | 76.83                                                          |
|      | Normal |                                                   |                                                      | 8.09                                | 4.59                                        | 56.68%                                               | 50.76                                             | 93.48%                                                     | 82.48                                                       | 72.13                                                          |
| 247  | Tumor  | 21                                                | 0                                                    | 9.35                                | 5.05                                        | 53.98%                                               | 49.86                                             | 91.82%                                                     | 73.86                                                       | 64.99                                                          |
|      | Normal |                                                   |                                                      | 7.99                                | 4.42                                        | 55.34%                                               | 49.64                                             | 91.41%                                                     | 73.32                                                       | 63.55                                                          |
| 248  | Tumor  | 34                                                | 14                                                   | 10.11                               | 5.44                                        | 53.79%                                               | 50.08                                             | 92.23%                                                     | 79.32                                                       | 69.82                                                          |
|      | Normal |                                                   |                                                      | 8.92                                | 4.8                                         | 53.79%                                               | 50.18                                             | 92.39%                                                     | 79.38                                                       | 69.04                                                          |
| 249  | Tumor  | 30                                                | 126                                                  | 7.95                                | 4.38                                        | 55.11%                                               | 49.99                                             | 92.05%                                                     | 65.24                                                       | 60.46                                                          |
|      | Normal |                                                   |                                                      | 11.34                               | 7.02                                        | 61.93%                                               | 50.98                                             | 93.88%                                                     | 120.49                                                      | 100.49                                                         |
| 250  | Tumor  | 19                                                | 40                                                   | 6.59                                | 3.64                                        | 55.15%                                               | 48.66                                             | 89.60%                                                     | 55.07                                                       | 51.19                                                          |
|      | Normal |                                                   |                                                      | 8.03                                | 4.59                                        | 57.21%                                               | 50.04                                             | 92.14%                                                     | 77.19                                                       | 67.9                                                           |
| 251  | Tumor  | 23                                                | 35                                                   | 8.87                                | 4.98                                        | 56.16%                                               | 49.45                                             | 91.07%                                                     | 77.77                                                       | 61.76                                                          |
|      | Normal |                                                   |                                                      | 8.42                                | 4.68                                        | 55.58%                                               | 49.53                                             | 91.21%                                                     | 80.65                                                       | 70.75                                                          |
| 252  | Tumor  | 42                                                | 98                                                   | 8.77                                | 5.03                                        | 57.37%                                               | 49.37                                             | 90.91%                                                     | 78.38                                                       | 66.08                                                          |
|      | Normal |                                                   |                                                      | 8.61                                | 4.72                                        | 54.83%                                               | 49.29                                             | 90.76%                                                     | 81.56                                                       | 61.34                                                          |
| 254  | Tumor  | 15                                                | 39                                                   | 7.29                                | 4.2                                         | 57.53%                                               | 49.84                                             | 91.78%                                                     | 62.28                                                       | 56.32                                                          |
|      | Normal |                                                   |                                                      | 9.37                                | 5.18                                        | 55.24%                                               | 49.47                                             | 91.09%                                                     | 88.1                                                        | 63                                                             |
| 255  | Tumor  | 4                                                 | 0                                                    | 7.79                                | 4.11                                        | 52.68%                                               | 49.42                                             | 91.00%                                                     | 59.48                                                       | 54.12                                                          |
|      | Normal |                                                   |                                                      | 9.61                                | 5.37                                        | 55.87%                                               | 50.21                                             | 92.47%                                                     | 89.93                                                       | 80.29                                                          |

|            |        |    |     |       |       |        |       |        |        |        |
|------------|--------|----|-----|-------|-------|--------|-------|--------|--------|--------|
| <b>257</b> | Tumor  | 37 | 14  | 8.53  | 5.07  | 59.46% | 50.32 | 92.66% | 78.64  | 68.18  |
|            | Normal |    |     | 7.04  | 3.98  | 56.53% | 49.24 | 90.67% | 68.53  | 62.41  |
| <b>258</b> | Tumor  | 53 | 102 | 9.95  | 6.52  | 65.58% | 51.04 | 93.98% | 102.45 | 83.65  |
|            | Normal |    |     | 8.37  | 4.82  | 57.67% | 49.68 | 91.48% | 83.37  | 74.53  |
| <b>259</b> | Tumor  | 17 | 0   | 13.16 | 7.11  | 54.03% | 51.38 | 94.62% | 108.68 | 97.98  |
|            | Normal |    |     | 10.47 | 5.71  | 54.52% | 50.65 | 93.26% | 97.63  | 84.28  |
| <b>260</b> | Tumor  | 23 | 5   | 14.34 | 8.64  | 60.27% | 51.54 | 94.90% | 131.42 | 72.96  |
|            | Normal |    |     | 11.71 | 6.85  | 58.54% | 51.31 | 94.48% | 117.5  | 100.23 |
| <b>261</b> | Tumor  | 25 | 7   | 9.56  | 5.79  | 60.61% | 50.49 | 92.98% | 88.32  | 71.42  |
|            | Normal |    |     | 11.13 | 6.78  | 60.87% | 51.17 | 94.22% | 115.79 | 99.11  |
| <b>313</b> | Tumor  | 23 | NA  | 20.15 | 12.12 | 60.14% | 52    | 96%    | 193    | 127    |
|            | Normal |    |     | 17.98 | 10.92 | 60.71% | 52.03 | 96%    | 191    | 116    |

**Supplementary Table 5** Summary table of Sanger sequencing of validation for randomly selected mutations from whole exome sequencing

|                                                    |     |
|----------------------------------------------------|-----|
| <b>Number of Mutations Selected for Validation</b> | 106 |
| <b>Number of Successful PCR Amplification</b>      | 91  |
| <b>Successful Rate of PCR</b>                      | 86% |
| <hr/>                                              |     |
| <b>Number of Confirmed Mutations</b>               | 81  |
| <b>Sensitivity of Whole Exome Sequencing</b>       | 89% |

**Supplementary Table 6** Summary and Statistical Analysis of patients age, groups by different gene mutations

|                                                        | <b>median</b> | <b>p-value</b>                  |
|--------------------------------------------------------|---------------|---------------------------------|
| <i>IDH1</i> MUT (n=8)                                  | 42.5          | 0.00555 (t-test)                |
| <i>IDH1</i> WT (n=42)                                  | 24            |                                 |
| <i>H3F3A</i> MUT (n=27)                                | 24            | 0.1731 (t-test)                 |
| <i>H3F3A</i> WT (n=23)                                 | 32            |                                 |
| <i>TP53</i> MUT (n=32)                                 | 26            | 0.6321 (t-test)                 |
| <i>TP53</i> WT (n=18)                                  | 24            |                                 |
| <i>PPM1D</i> MUT/ <i>H3F3A</i> MUT in brainstem (n= 6) | 25.5          | 0.4787 (Wilcoxon rank sum test) |
| <i>TP53</i> MUT/ <i>H3F3A</i> MUT in brainstem (n=9)   | 25            |                                 |

**Supplementary Table 7** Survival and treatment information for brainstem glioma patients

| Case ID       | Histopathology    | Grade | Overall Survival (Month) | Survival Status (1=death, 0=living) | Treatment                                                      |
|---------------|-------------------|-------|--------------------------|-------------------------------------|----------------------------------------------------------------|
| <b>BST-2</b>  | Astrocytoma       | II    | 11.25                    | 1                                   | Surgery + Chemotherapy                                         |
| <b>234</b>    | Astrocytoma       | III   | 2                        | 1                                   | Surgery                                                        |
| <b>19</b>     | Oligoastrocytoma  | II    | 0.5                      | 1                                   | Surgery                                                        |
| <b>235</b>    | Oligodendroglioma | III   | 1                        | 1                                   | Surgery                                                        |
| <b>8</b>      | GBM               | IV    | 4                        | 1                                   | Surgery                                                        |
| <b>4</b>      | Astrocytoma       | II    | 27.3                     | 0                                   | Surgery                                                        |
| <b>237</b>    | Oligoastrocytoma  | II    | 28.3                     | 0                                   | Surgery                                                        |
| <b>238</b>    | GBM               | IV    | 13                       | 1                                   | Surgery                                                        |
| <b>6</b>      | Astrocytoma       | II    | 29.05                    | 0                                   | Surgery                                                        |
| <b>13</b>     | Oligoastrocytoma  | II    | 26.3                     | 0                                   | Surgery                                                        |
| <b>16</b>     | Astrocytoma       | II    | 32.05                    | 0                                   | Surgery + Radiotherapy                                         |
| <b>239</b>    | Oligoastrocytoma  | III   | 0.75                     | 1                                   | Surgery                                                        |
| <b>240</b>    | Oligoastrocytoma  | III   | 5                        | 1                                   | Surgery + Radiotherapy                                         |
| <b>2</b>      | Oligoastrocytoma  | II    | 13.75                    | 0                                   | Surgery + Radiotherapy                                         |
| <b>241</b>    | Astrocytoma       | III   | 31.8                     | 0                                   | Surgery + Concurrent chemoradiotherapy + adjuvant chemotherapy |
| <b>242</b>    | Oligoastrocytoma  | III   | 32.3                     | 0                                   | Surgery + Concurrent chemoradiotherapy                         |
| <b>243</b>    | Oligoastrocytoma  | III   | 29                       | 1                                   | Surgery + Concurrent chemoradiotherapy + adjuvant chemotherapy |
| <b>244</b>    | Oligoastrocytoma  | II    | 33.05                    | 0                                   | Surgery + Radiotherapy                                         |
| <b>BST-14</b> | Oligoastrocytoma  | II    | 33.8                     | 0                                   | Surgery + Radiotherapy                                         |
| <b>BST-15</b> | Astrocytoma       | II    | 14                       | 1                                   | Surgery                                                        |
| <b>245</b>    | Oligoastrocytoma  | II    | 35.3                     | 0                                   | Surgery + Concurrent chemoradiotherapy + adjuvant chemotherapy |
| <b>BST-17</b> | Oligoastrocytoma  | II    | 18                       | 1                                   | Surgery + Concurrent chemoradiotherapy + adjuvant chemotherapy |
| <b>246</b>    | Astrocytoma       | II    | 17                       | 1                                   | Surgery                                                        |
| <b>247</b>    | GBM               | IV    | 2                        | 0                                   | Surgery                                                        |
| <b>BST-20</b> | Astrocytoma       | II    | 27.3                     | 0                                   | Surgery                                                        |
| <b>3</b>      | Astrocytoma       | II    | 5                        | 1                                   | Surgery                                                        |
| <b>9</b>      | Astrocytoma       | II    | 18.3                     | 0                                   | Surgery                                                        |
| <b>11</b>     | Oligoastrocytoma  | II    | 17                       | 0                                   | Surgery + Radiotherapy                                         |
| <b>12</b>     | Astrocytoma       | III   | 0.25                     | 0                                   | Surgery                                                        |
| <b>14</b>     | Astrocytoma       | II    | 3                        | 0                                   | Surgery                                                        |
| <b>18</b>     | Astrocytoma       | II    | 20.3                     | 1                                   | Surgery + Concurrent chemoradiotherapy                         |
| <b>24</b>     | Astrocytoma       | III   | 10.75                    | 1                                   | Surgery                                                        |
| <b>313</b>    | GBM               | IV    | 18                       | 0                                   | Surgery + Radiotherapy                                         |

**Supplementary Table 9** Primers used for generating the truncating mutations (PPM1D472 and PPM1D540)

|                 | <b>Forward</b>                 | <b>Reverse</b>                         |
|-----------------|--------------------------------|----------------------------------------|
| <b>PPM1D472</b> | 5'-GGAATGGCGGGGCTGTACTCGCTG-3' | 5'-GGGTTATGGATCTTTTGAGGGTATGACTAC-3'   |
| <b>PPM1D540</b> | 5'-GGAATGGCGGGGCTGTACTCGCTG-3' | 5'-GGGCTATTCTAATGTCCTTTTAAAGTTTGTGG-3' |
